# Supplementary material
Source: PubMed Central journal article supplement (PMC2755991)
Supplement: 01340.2008_2.pdf [file 01340.2008_2.pdf]

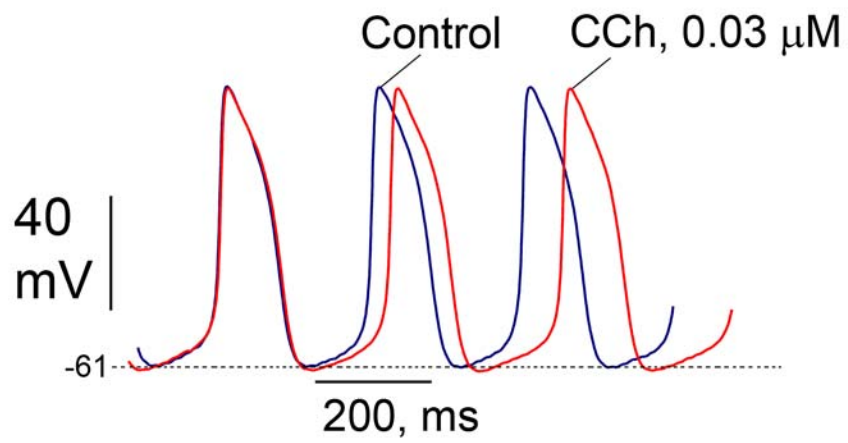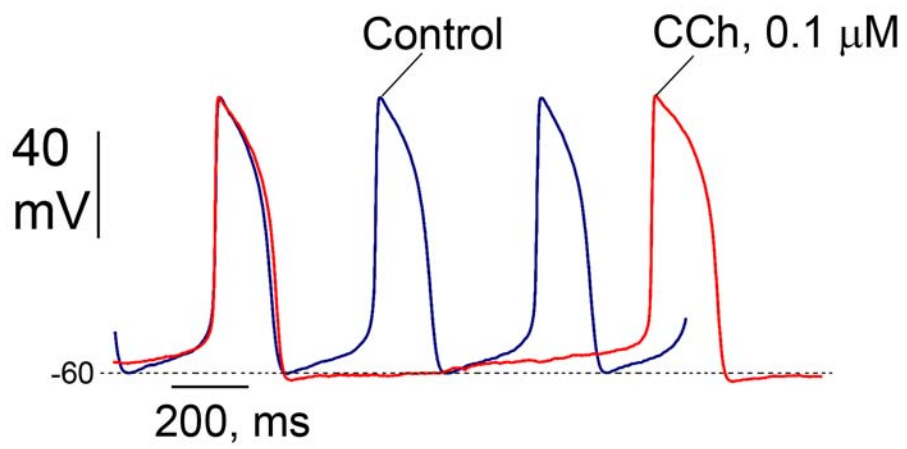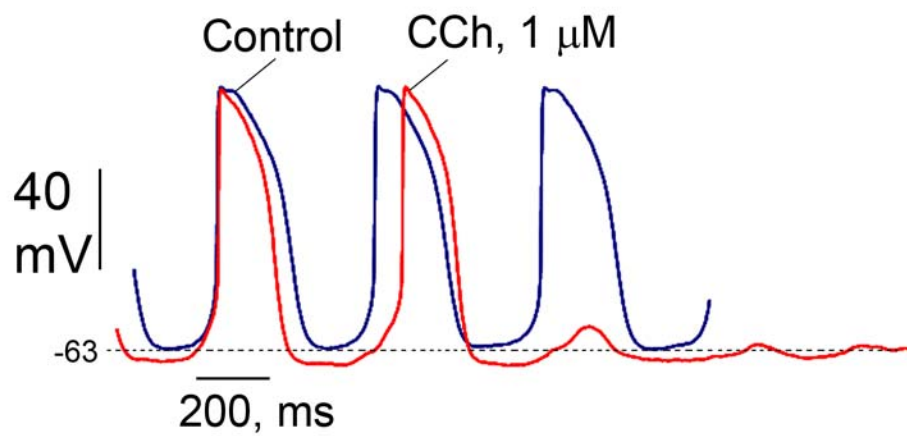

Fig. S-1

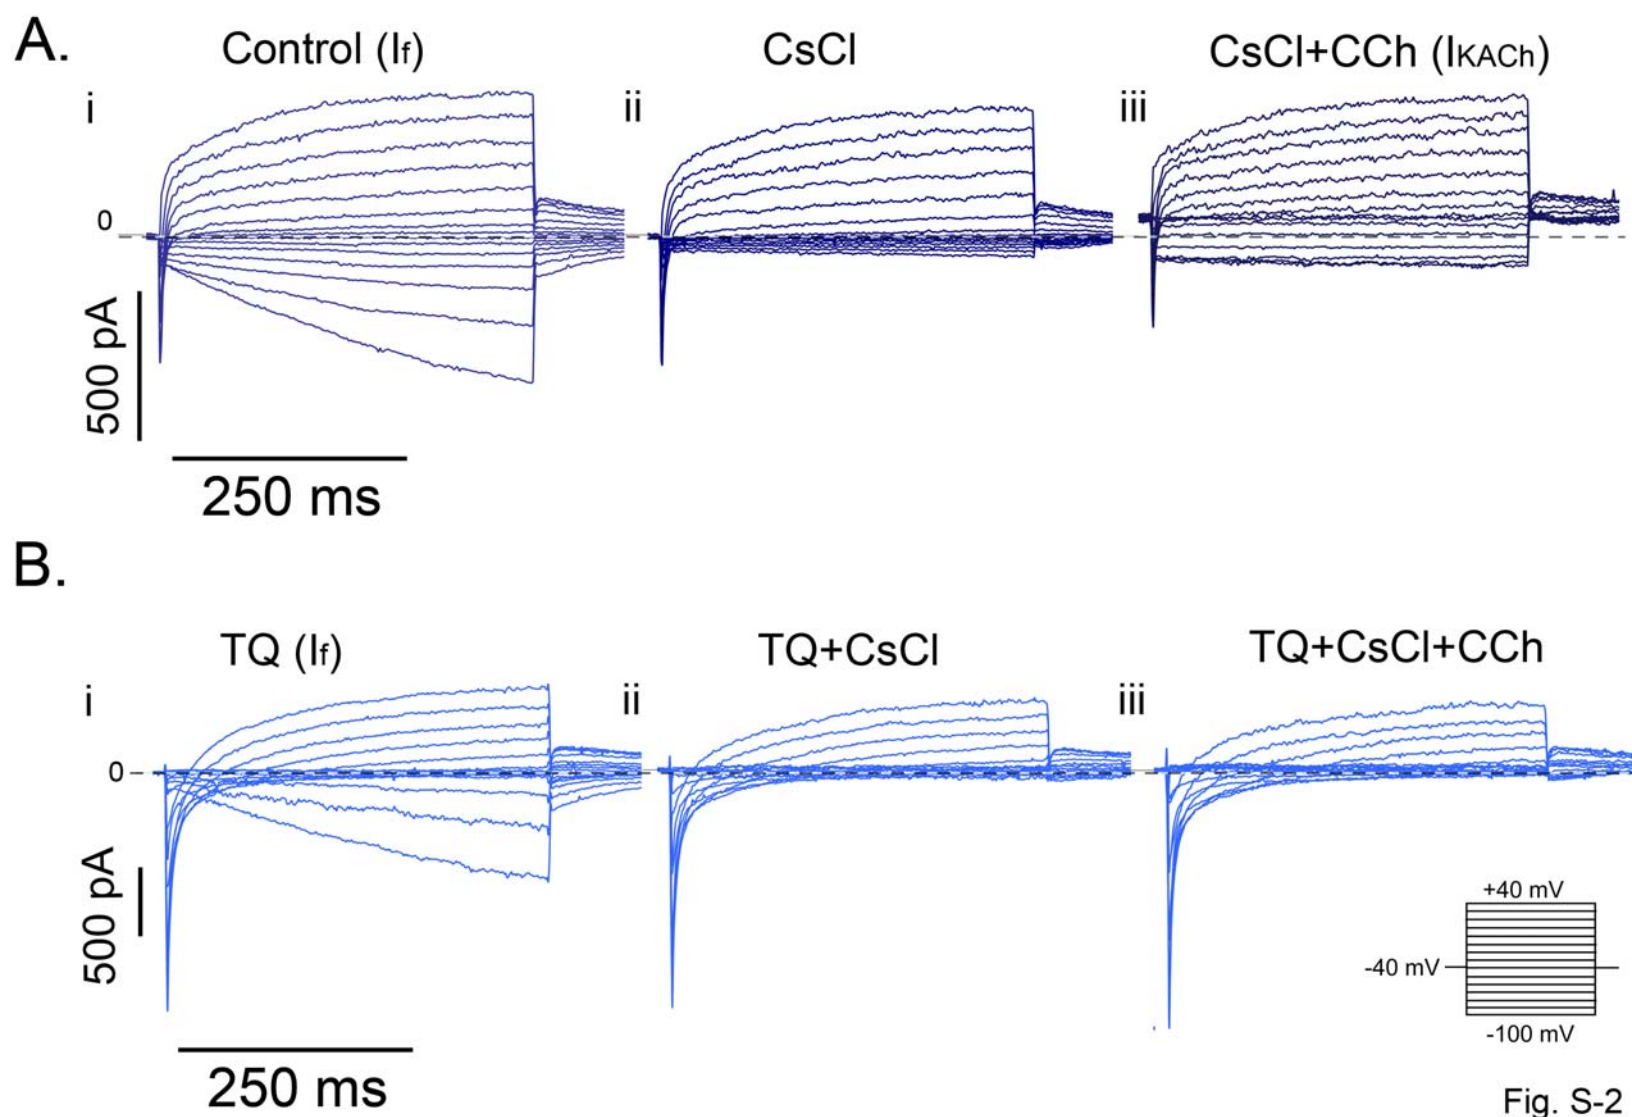

Fig. S-2

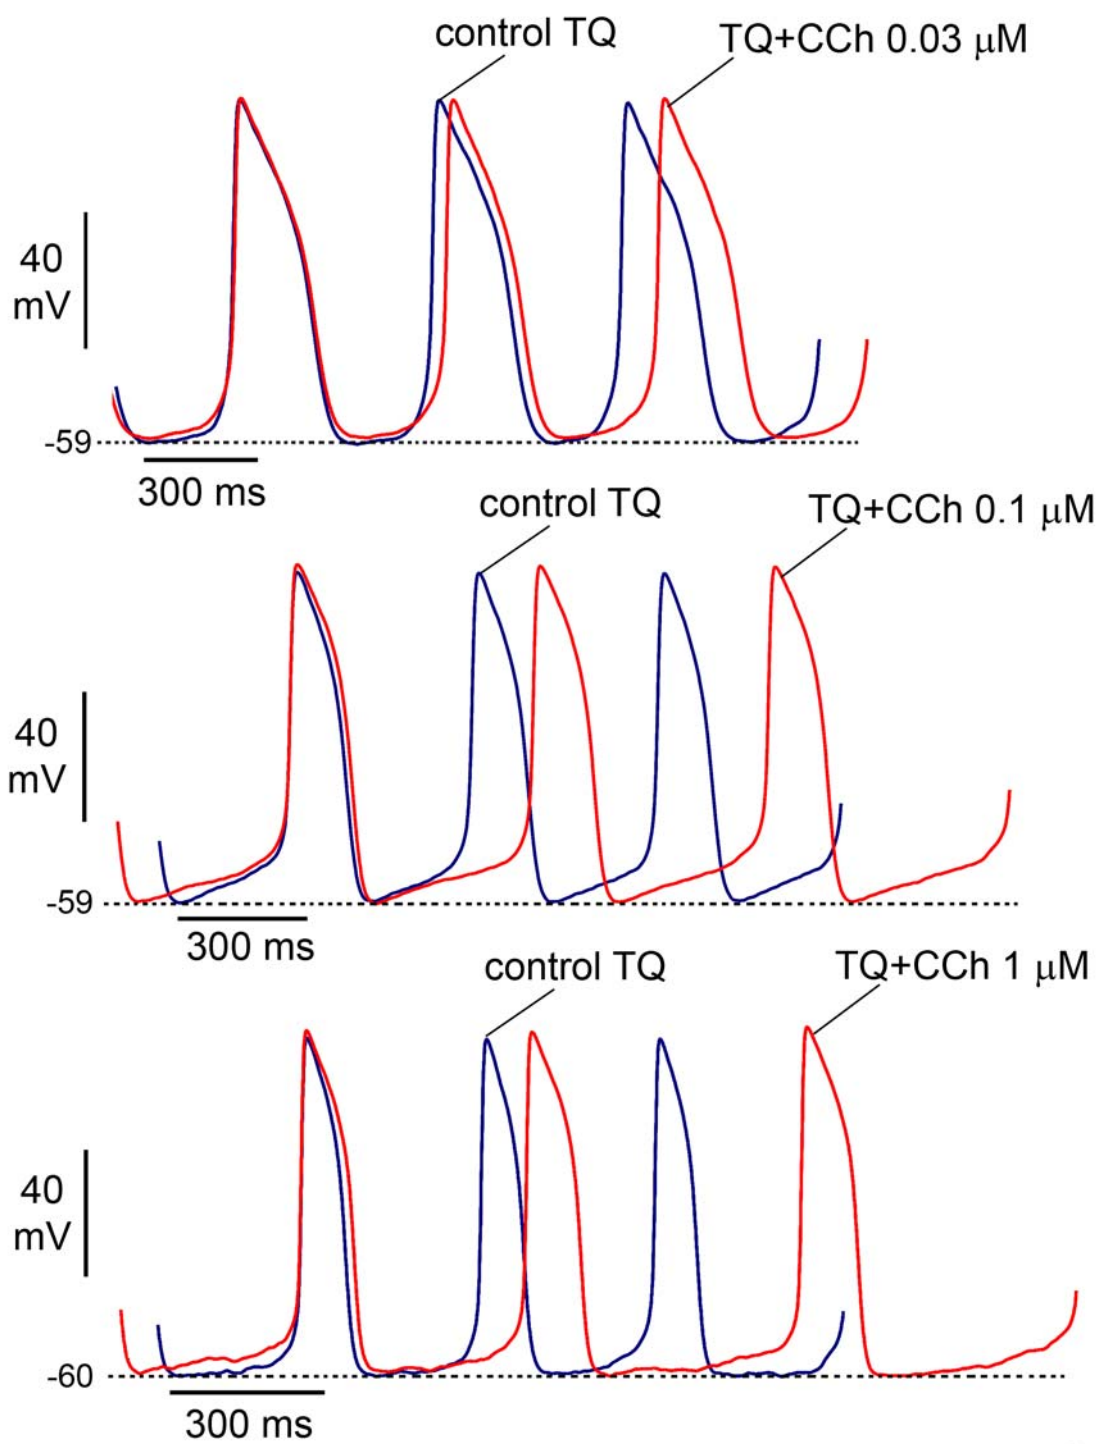

Fig. S-3

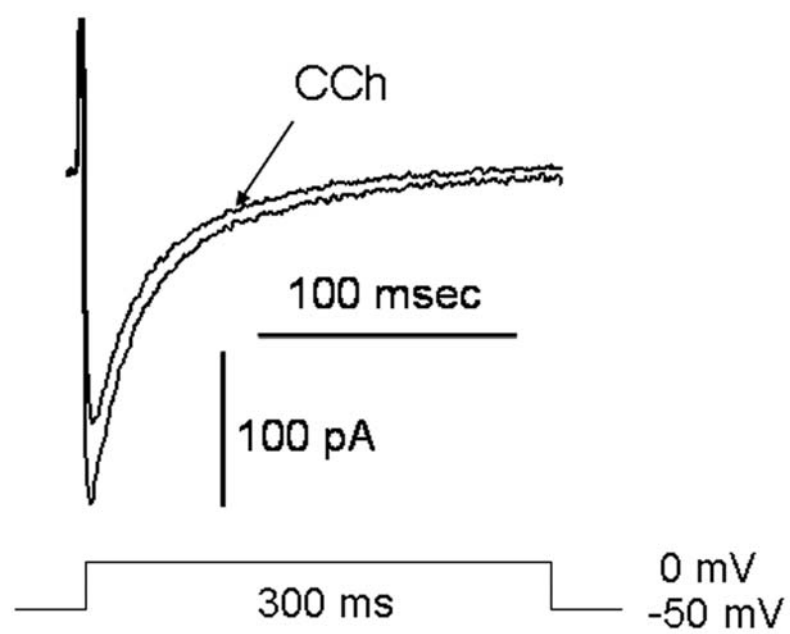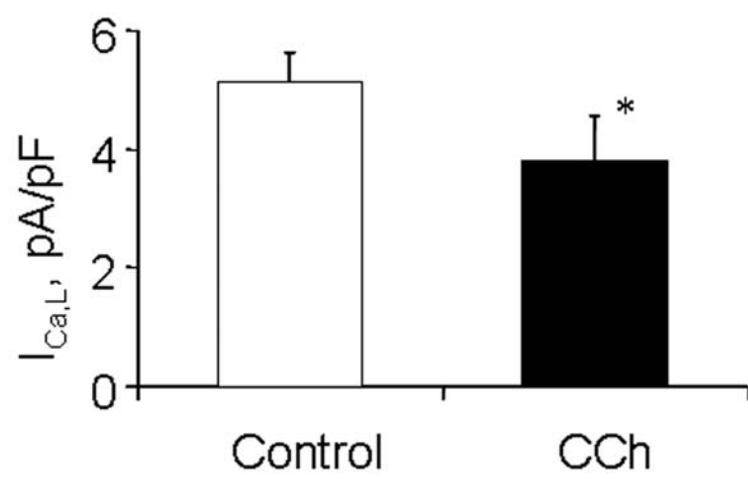

Fig. S-4

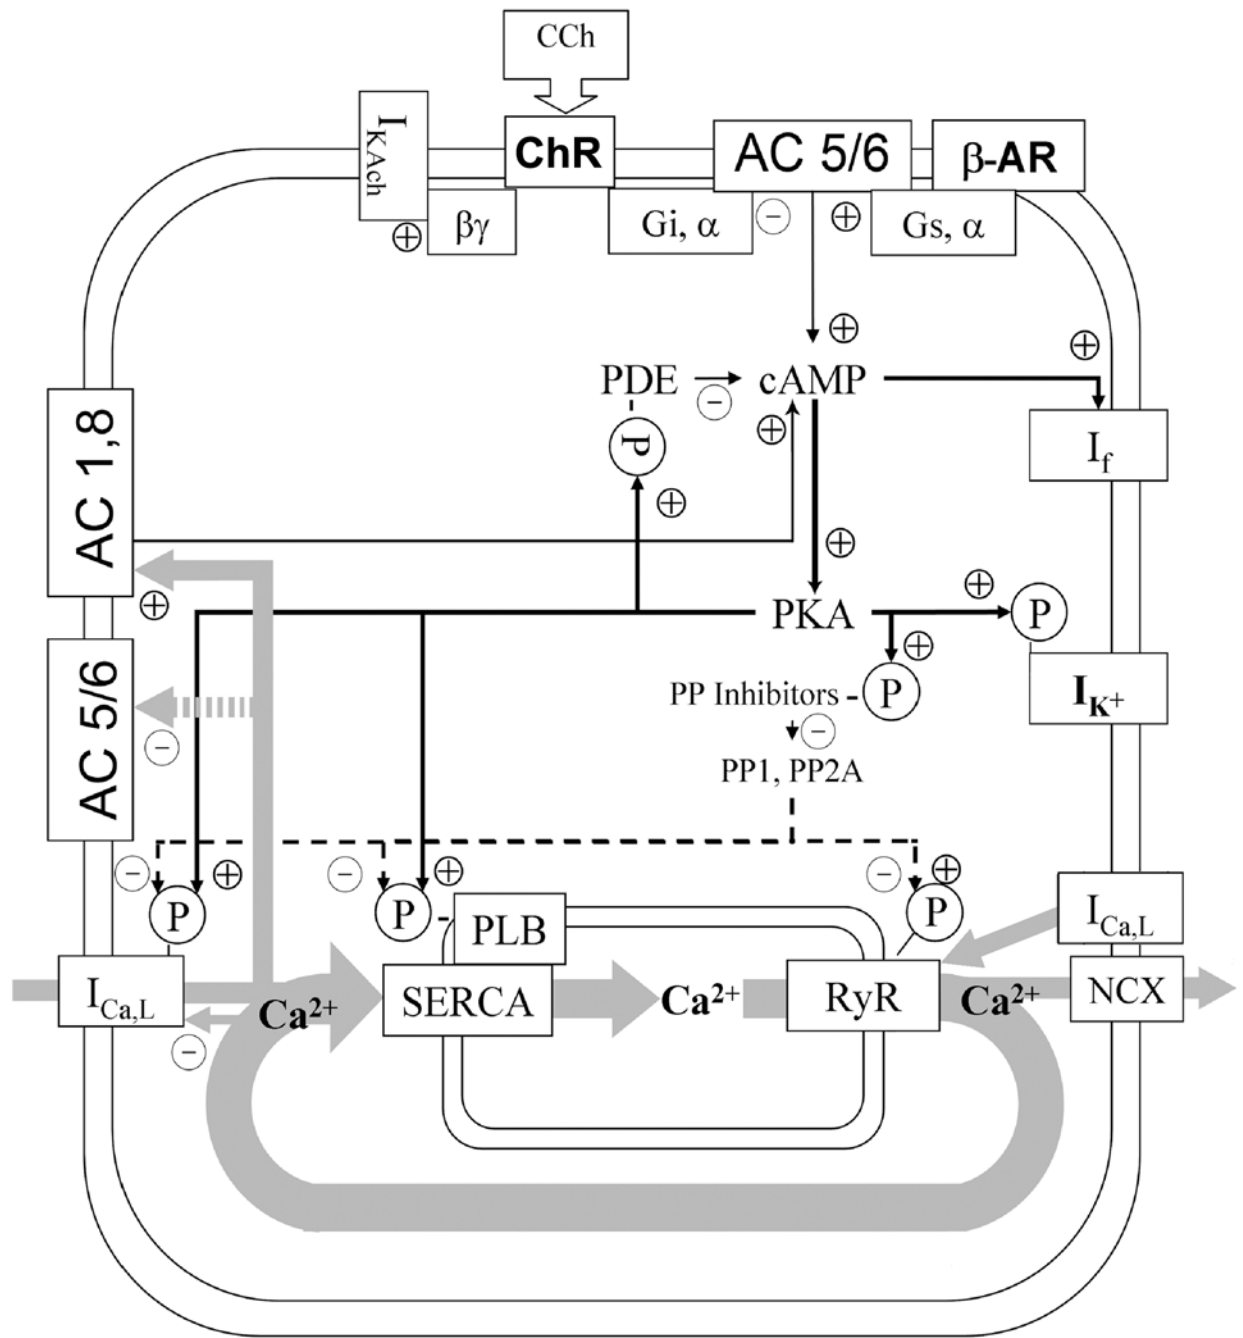

Fig. S-5

Table S-1 Effect of 100 nM CCh on AP parameters

|                | Control   | CsCl      | CCh         | CsCl+CCh   | TQ        | TQ+CsCl   | TQ+CCh    | TQ+CsCl+CCh |
|----------------|-----------|-----------|-------------|------------|-----------|-----------|-----------|-------------|
| Period, ms     | 313±32    | 333±14.0* | 1130±106.0* | 1017±43.0* | 299±10.9  | 296±29.8  | 381±21.3* | 380±50.0*   |
| MDP, mV        | -61.7±1.4 | -60.7±1.4 | -63.2±0.8*  | -62.5±2.1* | -59.8±1.1 | -60.7±0.2 | -59.9±1.1 | -60.2±0.2   |
| dV/dt max, V/s | 5.3±1.1   | 6.1±1.5   | 6.6±1.1     | 7.3±0.7    | 7.6±0.4   | 7.2±0.3   | 7.8±0.5   | 7.3±0.3     |
